# Supplementary material for: Investigation of Calcium and Magnesium Phosphate Crystals in Stones Treated with Diammonium Hydrogen Phosphate Conservation Product: Potential of Micro-Raman Spectroscopy
Source: MDPI journal article supplement (doi:10.3390/cryst13081212), 2023-08-05
Supplement: s1 [file s1]

Archive with 1 entries (1 files):
- crystals-2519185-supplementary.pdf
