# Supplementary material for: Investigation of Calcium and Magnesium Phosphate Crystals in Stones Treated with Diammonium Hydrogen Phosphate Conservation Product: Potential of Micro-Raman Spectroscopy
Source: MDPI journal article supplement (doi:10.3390/cryst13081212), 2023-08-05
Supplement: s1 [file s1 › crystals-2519185-supplementary.pdf]

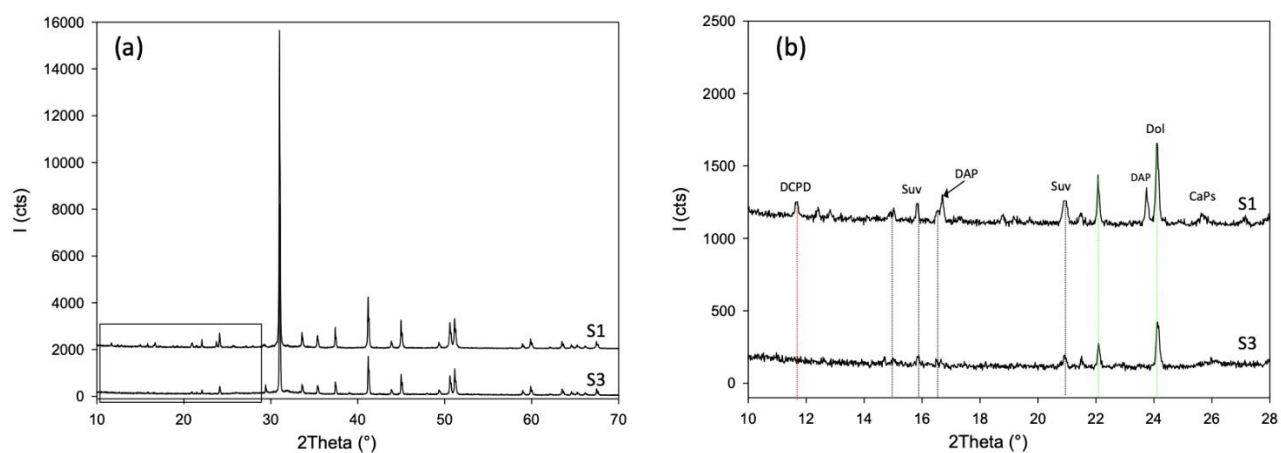

**Figure S1:** XRPD spectra acquired in samples S1 and S3 (a). Inset of the XRPD patterns (b) where the main diffraction peaks are labeled. DCPD: DCPD; Suv: struvite, Dol: dolomite, CaPs: calcium phosphates, DAP: diammonium hydrogen phosphate.

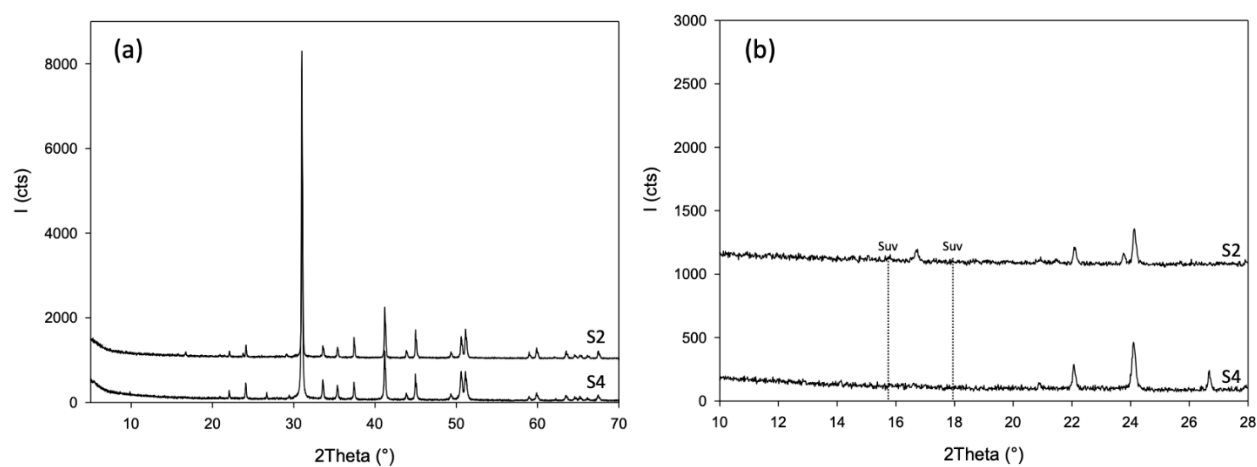

**Figure S2:** XRPD spectra acquired in samples S2 and S4 (a). Inset of the XRPD patterns (b) where the main diffraction peaks are labeled. Suv: struvite.

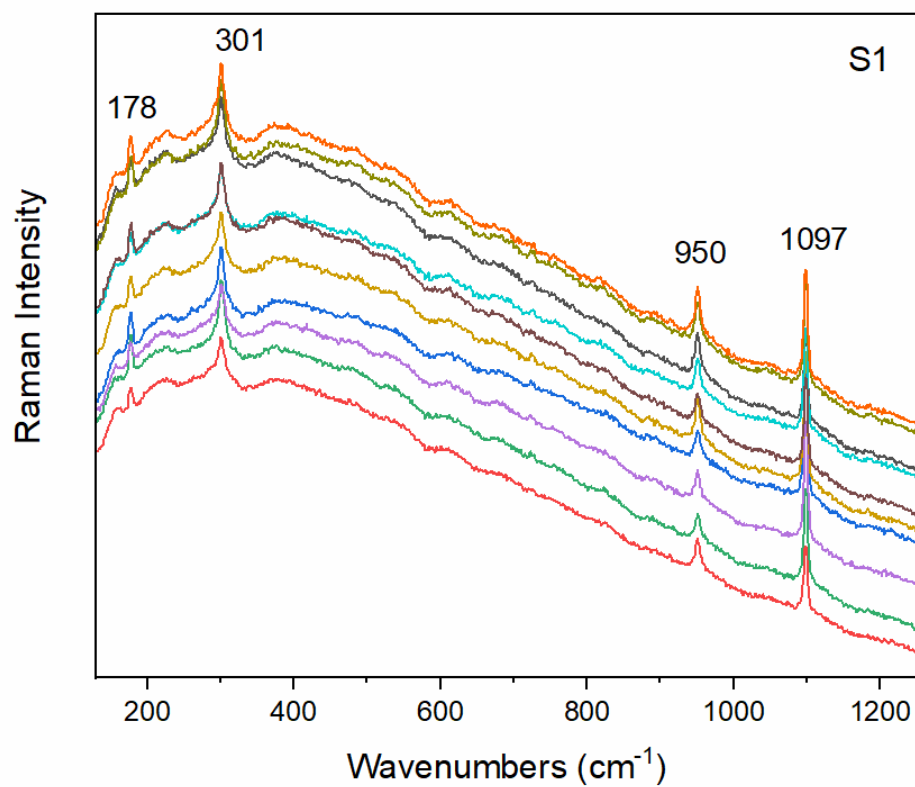

**Figure S3:** Representative Raman spectra acquired in samples S1. Struvite band at  $950\text{ cm}^{-1}$  and dolomite at  $1097$ ,  $301$  and  $178\text{ cm}^{-1}$  are mainly present.

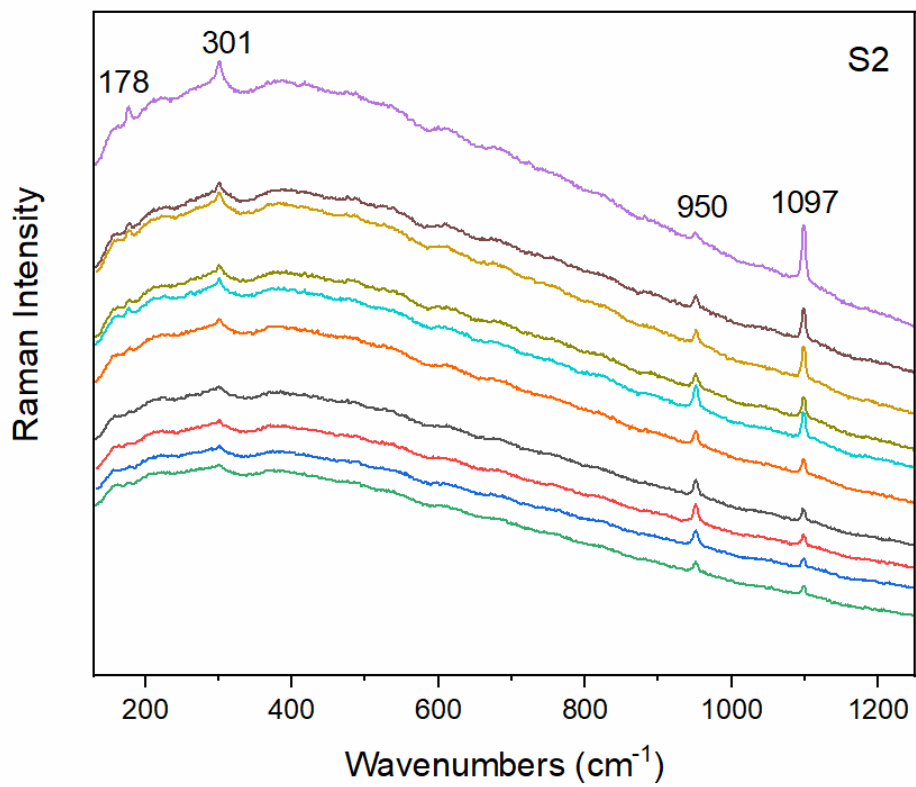

**Figure S4:** Representative Raman spectra acquired in samples S2. Struvite band at 950  $\text{cm}^{-1}$  and dolomite at 1097, 301 and 178  $\text{cm}^{-1}$  are mainly present.

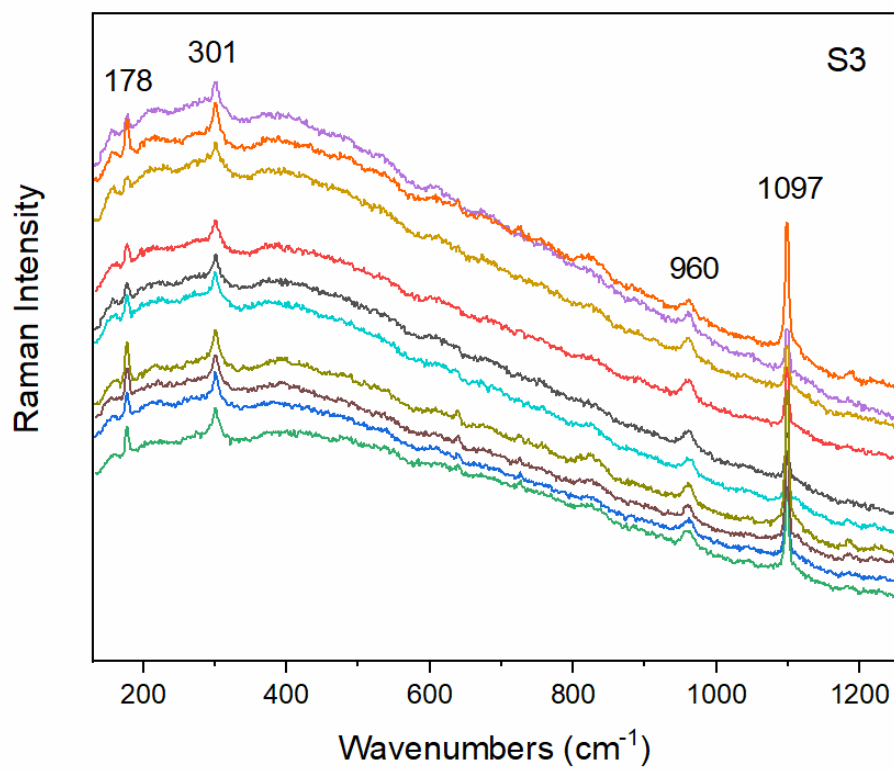

**Figure S5:** Representative Raman spectra acquired in samples S3. HAP/OCP band at 960  $\text{cm}^{-1}$  and dolomite at 1097, 301 and 178  $\text{cm}^{-1}$  are mainly present.

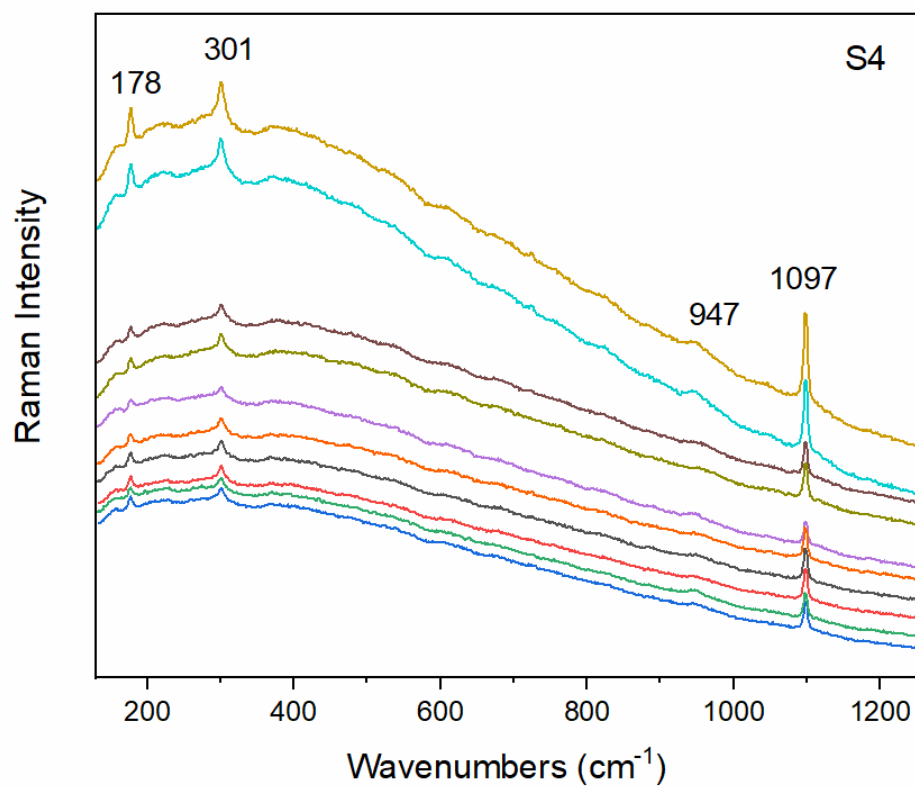

**Figure S6:** Representative Raman spectra acquired in samples S4. An unidentified broad band at 947 cm<sup>-1</sup> is present, along with dolomite at 1097, 301 and 178 cm<sup>-1</sup>.

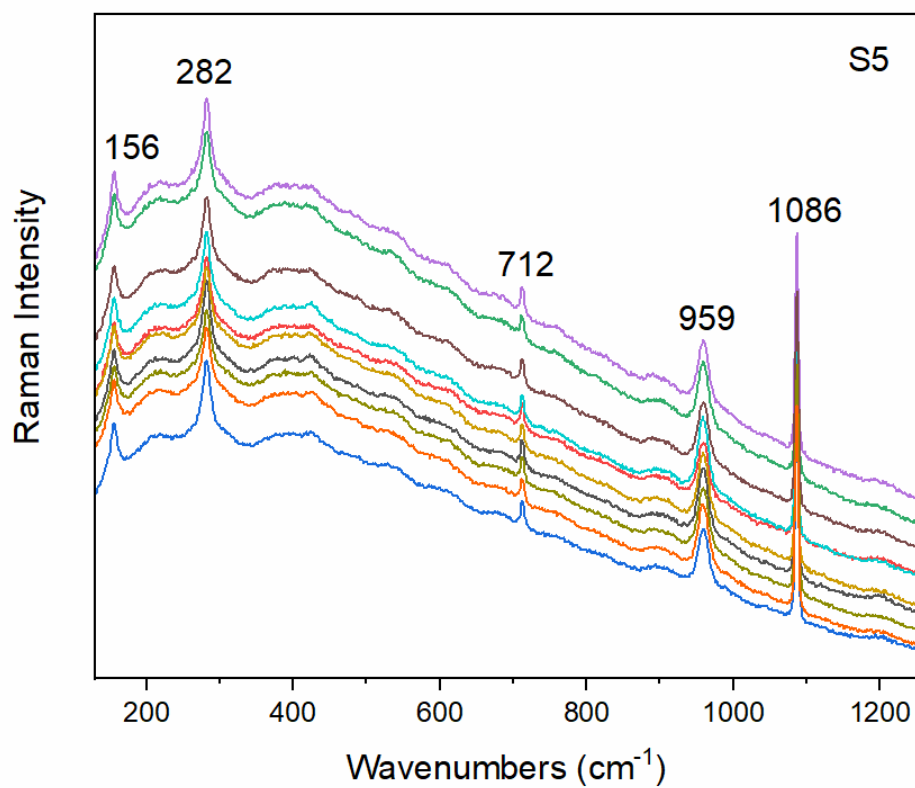

**Figure S7:** Representative Raman spectra acquired in samples S5. HAP/OCP band at 959  $\text{cm}^{-1}$  and calcite at 1089, 712 and 282 and 156  $\text{cm}^{-1}$  are mainly present.

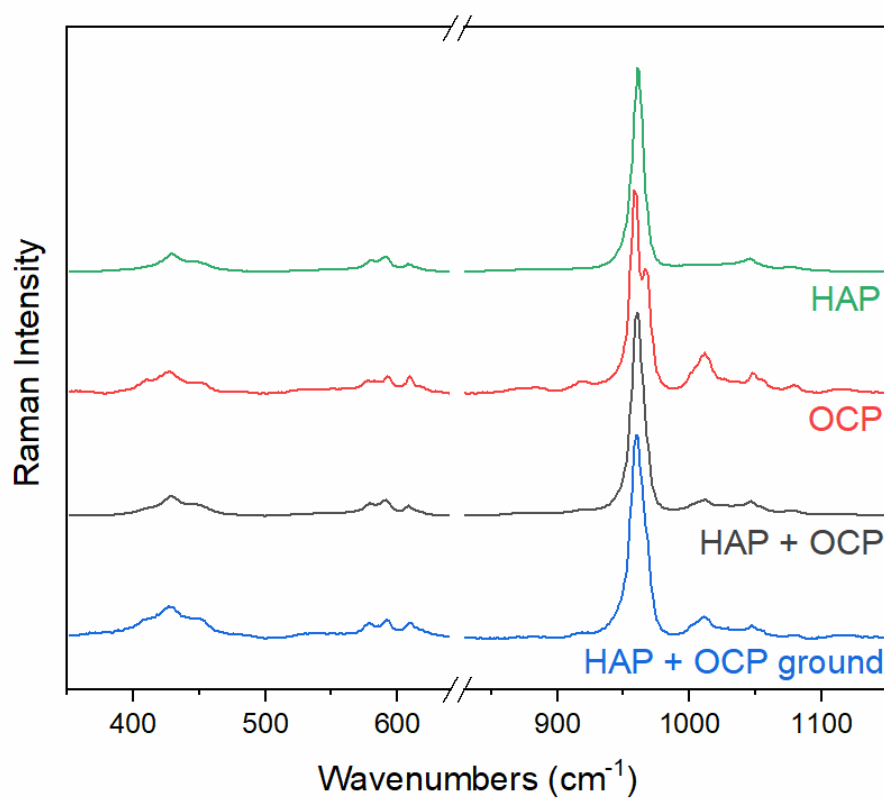

**Figure S8:** Averaged Raman spectra of reference pure powders (HAP and OCP), of the physical mixture (HAP+OCP) and of the ground physical mixture (HAP+OCP ground). See Figure 4 for the frequency values.
